# Supplementary material for: Tricarbonyl triazolato Re(i) compounds of pyridylbenzimidazole ligands: spectroscopic and antimicrobial activity evaluation
Source: Royal Society of Chemistry journal article supplement (doi:10.1039/d1ra03063a), 2021-01-01
Supplement: d1ra03063a1.pdf [file d1ra03063a1.pdf]

### Supporting information

|                 |                                                                                                                     |            |
|-----------------|---------------------------------------------------------------------------------------------------------------------|------------|
| <b>Fig. S1</b>  | AT IR spectra of the Re(I) azide complexes, a) <b>2</b> and b) <b>5</b> .                                           | <b>S2</b>  |
| <b>Fig. S2</b>  | NMR analysis of <b>2</b> in DMSO-d <sub>6</sub> , a) <sup>1</sup> H, and b) <sup>13</sup> C spectra.                | <b>S3</b>  |
| <b>Fig. S3</b>  | NMR analysis of <b>5</b> in DMSO-d <sub>6</sub> , a) <sup>1</sup> H, and b) <sup>13</sup> C spectra.                | <b>S4</b>  |
| <b>Fig. S4</b>  | AT IR spectra of the Re(I) azide complexes, a) <b>3</b> and b) <b>6</b> .                                           | <b>S5</b>  |
| <b>Fig. S5</b>  | NMR analysis of <b>3</b> in DMSO-d <sub>6</sub> , a) <sup>1</sup> H, and b) <sup>13</sup> C spectra.                | <b>S6</b>  |
| <b>Fig. S6</b>  | NMR analysis of <b>6</b> in DMSO-d <sub>6</sub> , a) <sup>1</sup> H, and b) <sup>13</sup> C spectra.                | <b>S7</b>  |
| <b>Fig. S7</b>  | Electronic absorption spectra of the complexes in DMSO.                                                             | <b>S8</b>  |
| <b>Fig. S8</b>  | Calculated electronic spectra of <b>6</b> at TD/PCM(DMSO)/CAM-B3LYP/LANL2DZ level of theory in the singlet state.   | <b>S9</b>  |
| <b>Table S1</b> | Selected frontiers molecular orbitals of <b>6</b> in the singlet state calculated at B3LYP/LANL2DZ level of theory. | <b>S11</b> |

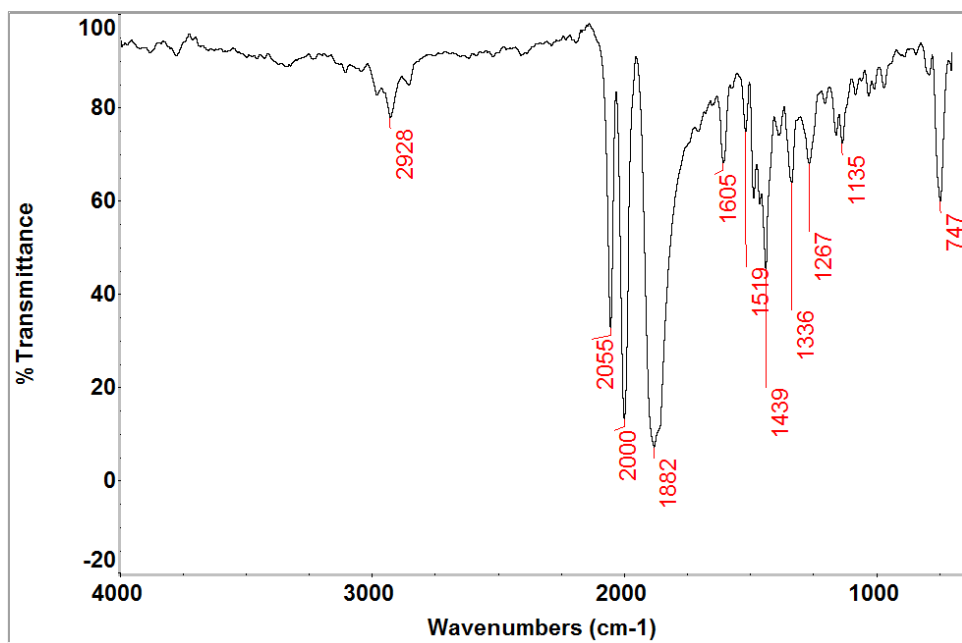

a)

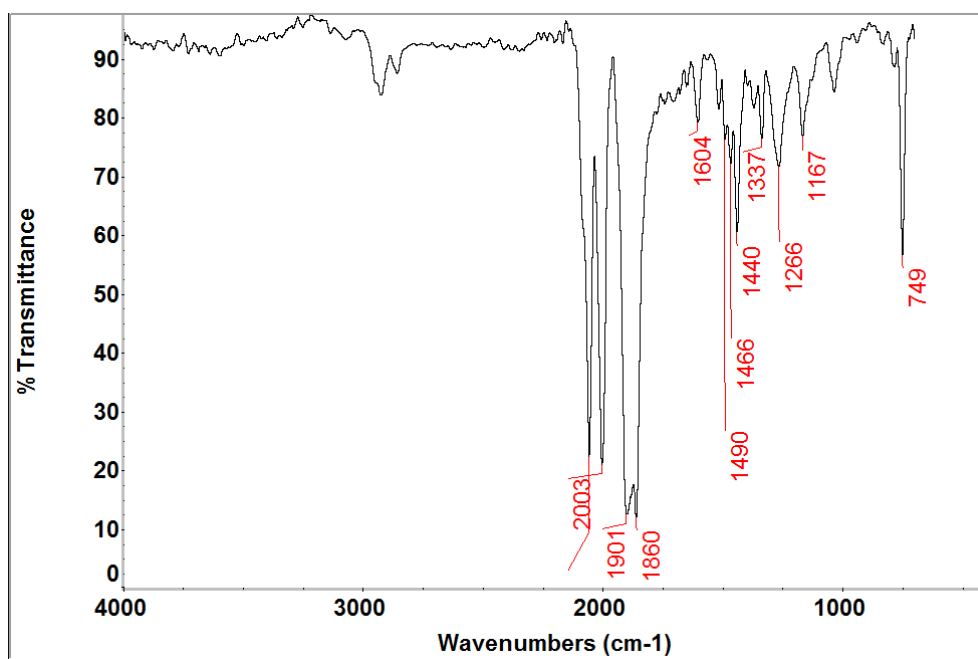

b)

**Fig. S1** AT IR spectra of the Re(I) azide complexes, a) **2** and b) **5**.

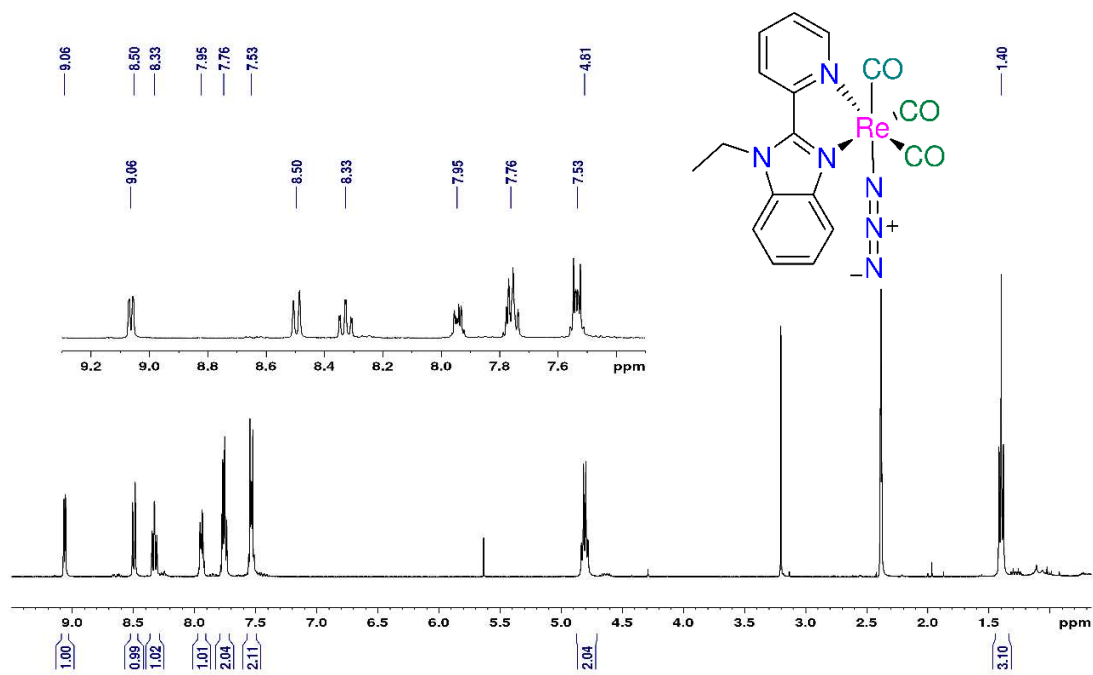

a)

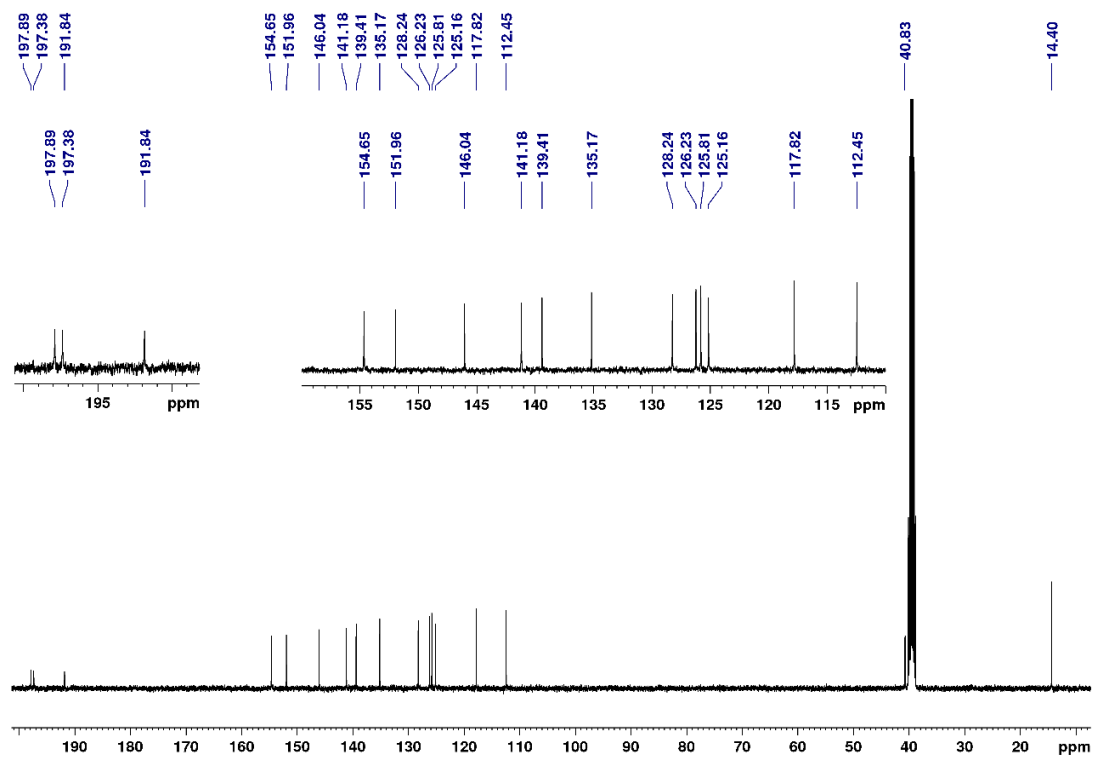

b)

Fig. S2 NMR analysis of **2** in DMSO-d<sub>6</sub>, a) <sup>1</sup>H, and b) <sup>13</sup>C spectra.

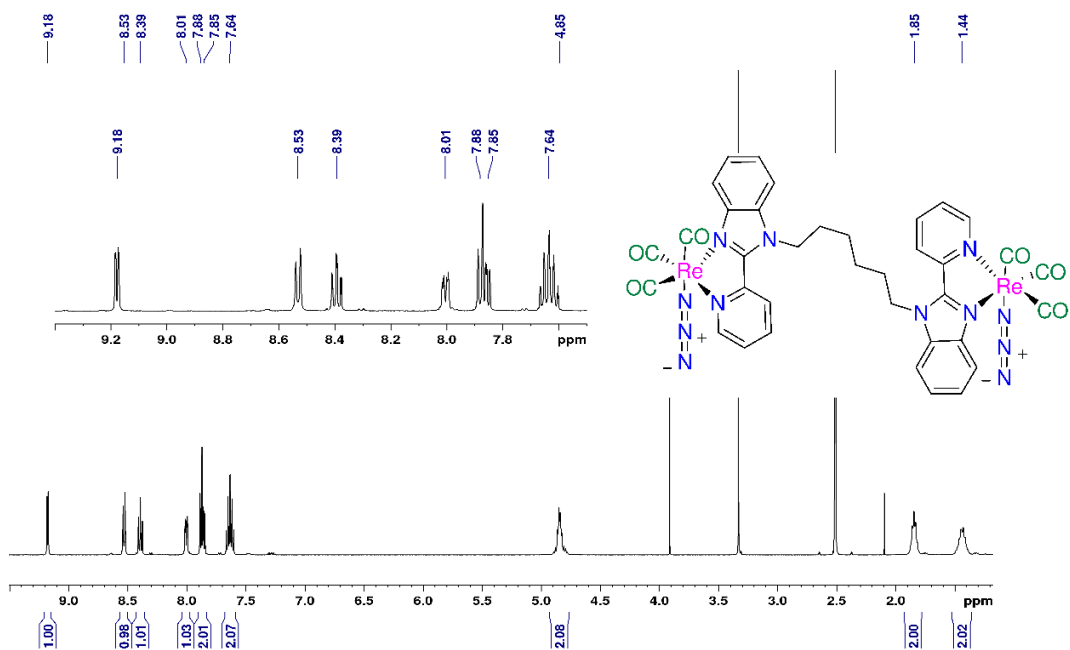

a)

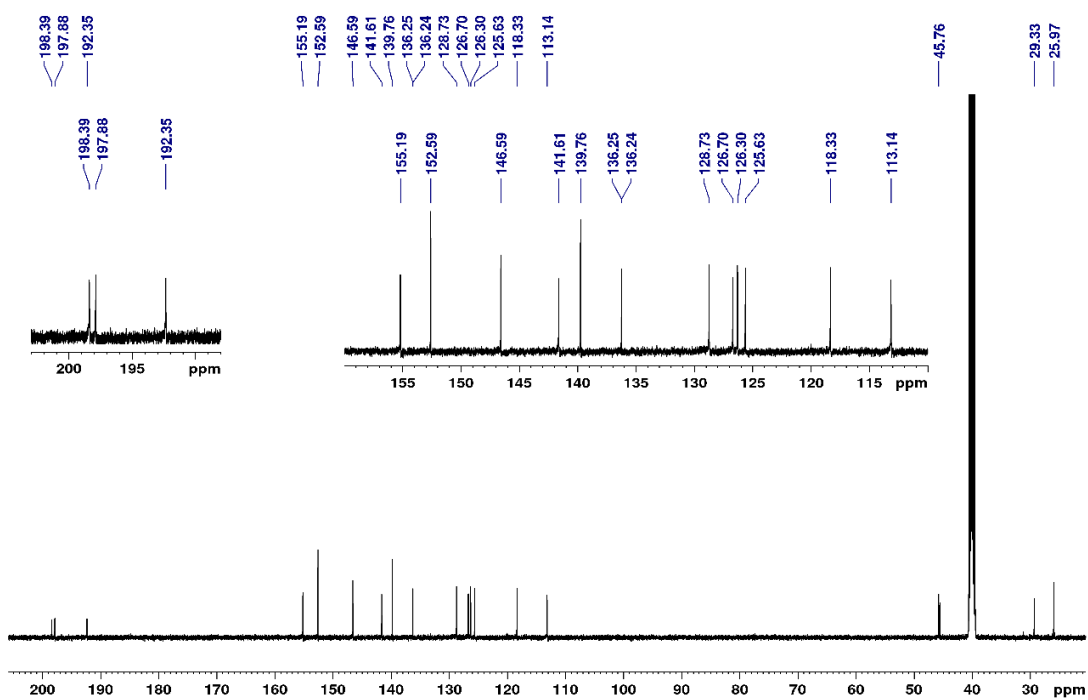

b)

**Fig. S3** NMR analysis of **5** in DMSO-d<sub>6</sub>, a) <sup>1</sup>H, and b) <sup>13</sup>C spectra.

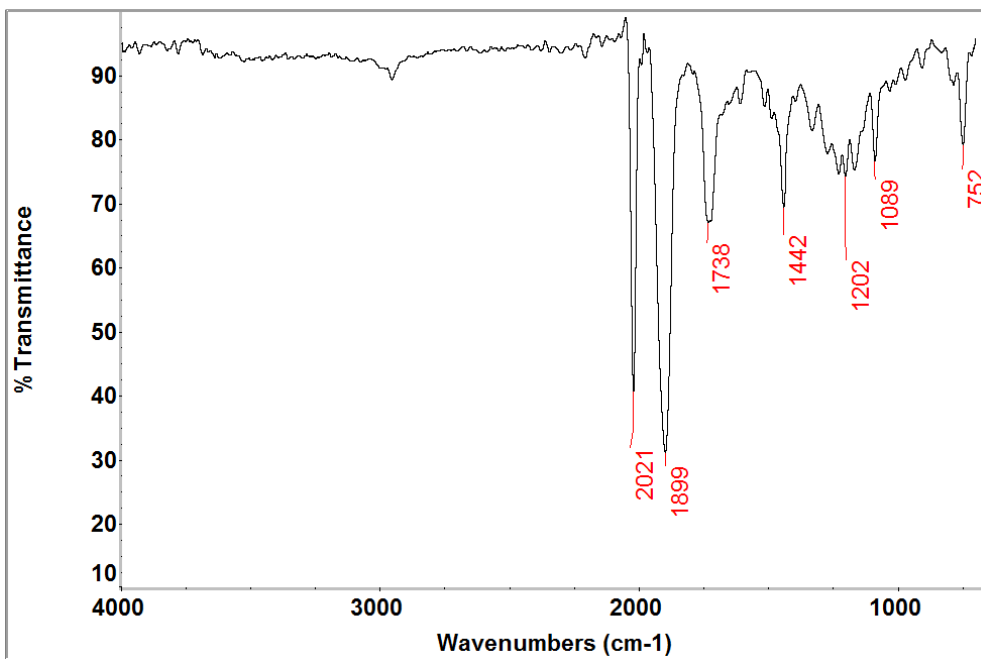

a)

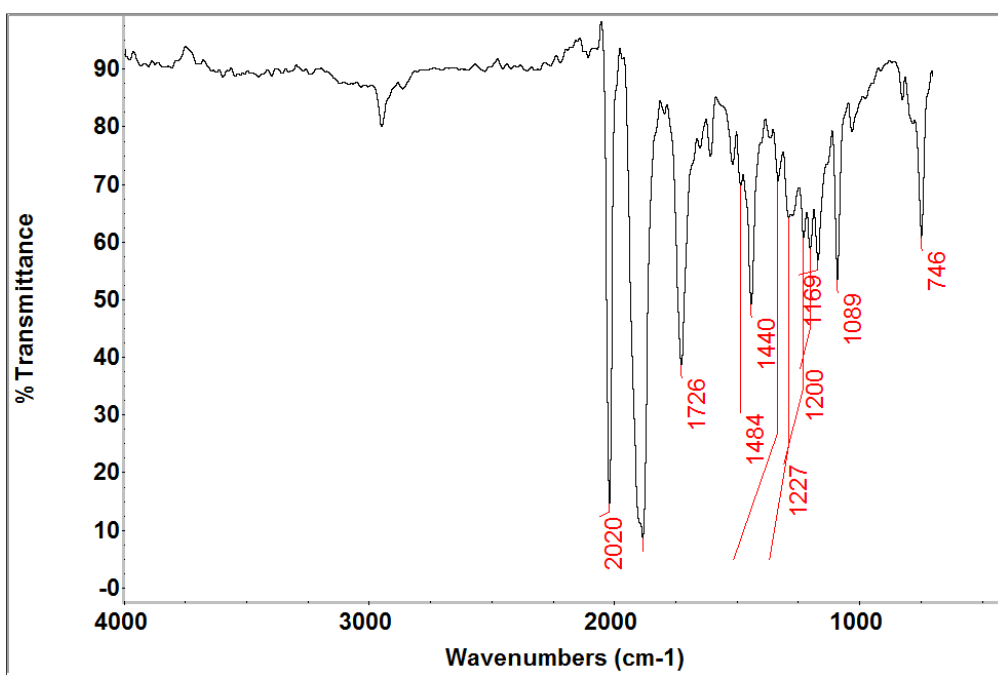

b)

**Fig. S4** AT IR spectra of the Re(I) azide complexes, a) **3** and b) **6**.

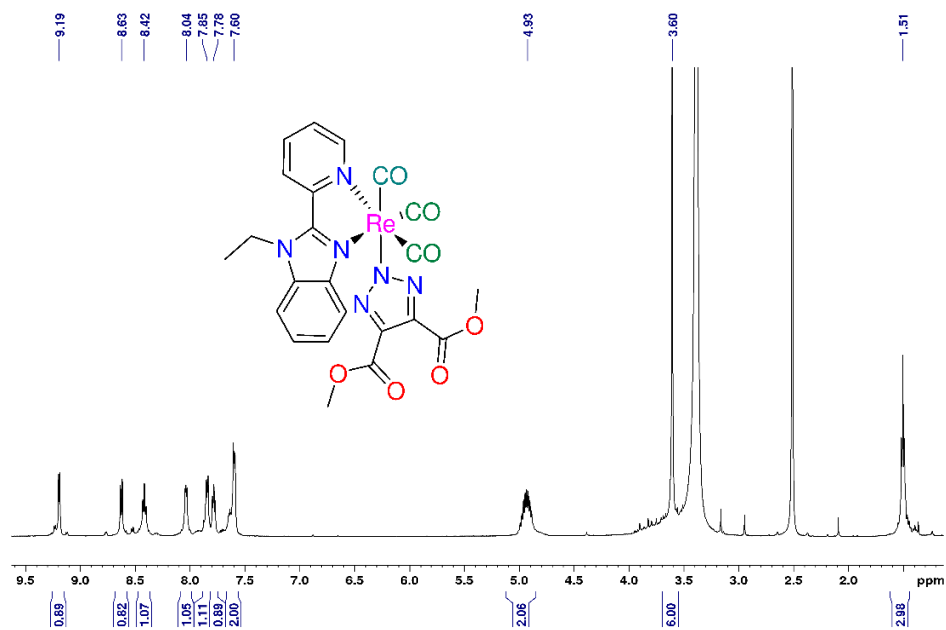

a)

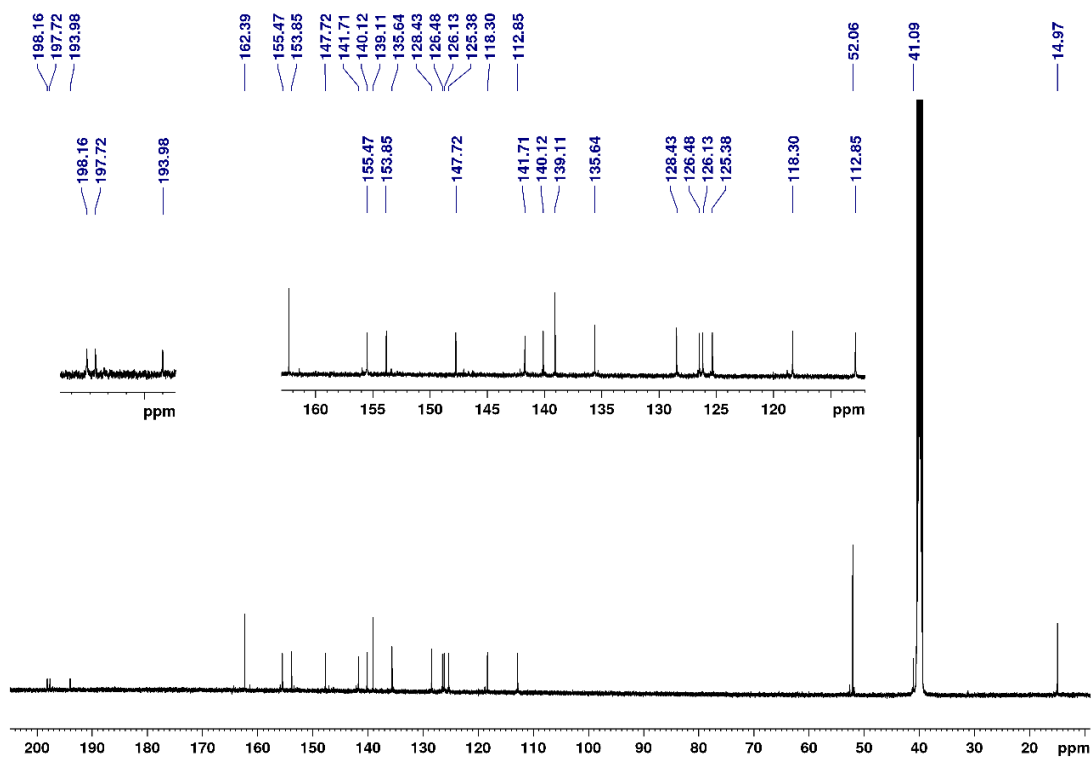

b)

Fig. S5 NMR analysis of **3** in DMSO-d<sub>6</sub>, a) <sup>1</sup>H, and b) <sup>13</sup>C spectra.

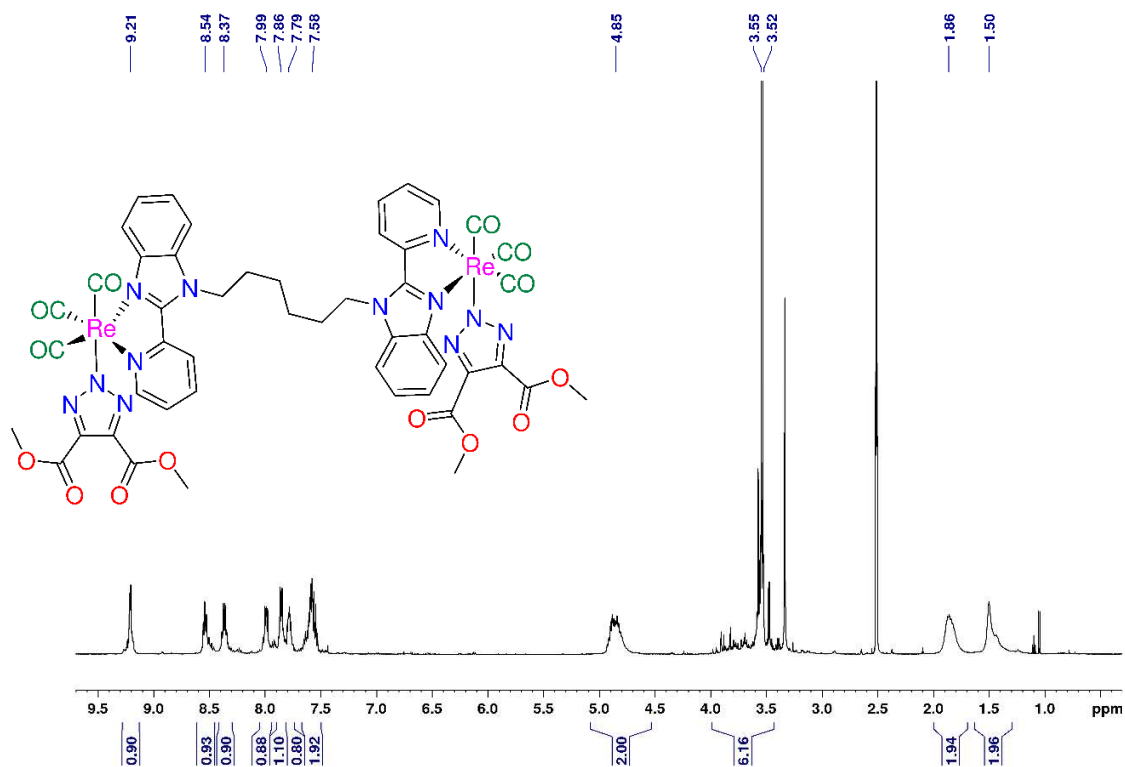

a)

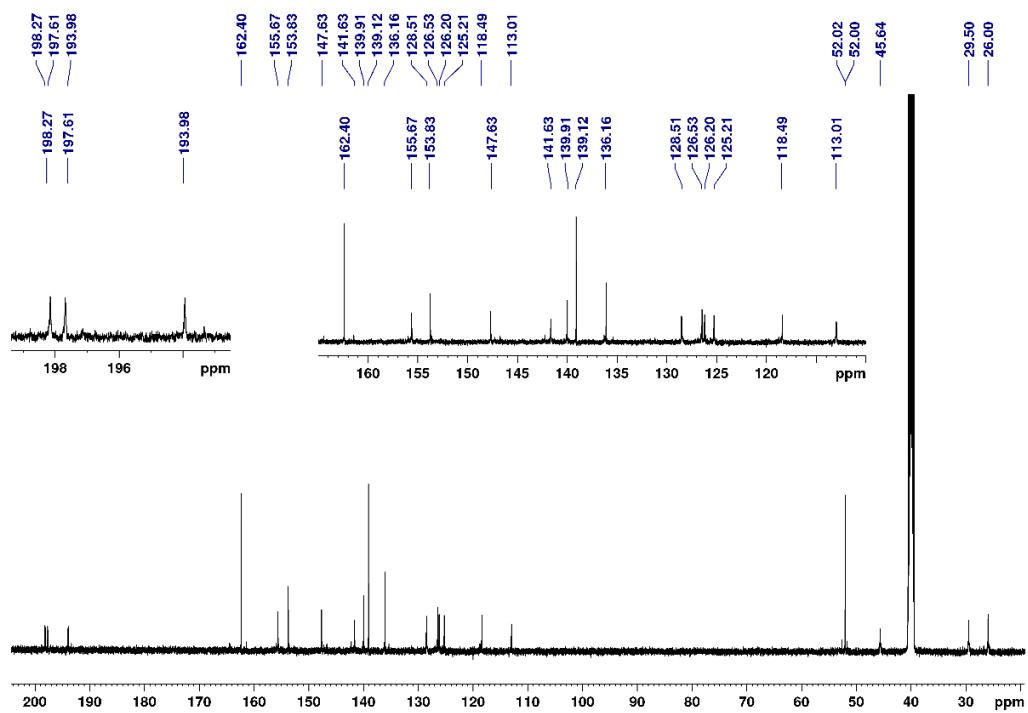

b)

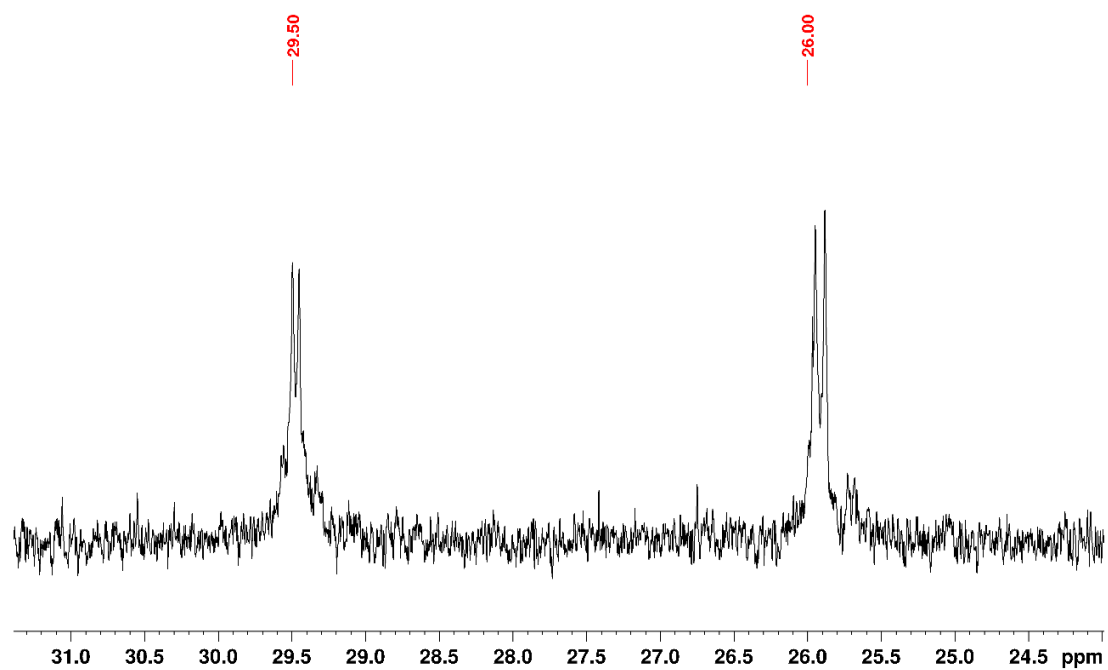

c)

**Fig. S6** NMR analysis of **6** in DMSO- $d_6$ , a)  $^1\text{H}$ , b)  $^{13}\text{C}$  and c) representative zoom in section of  $^{13}\text{C}$  spectra.



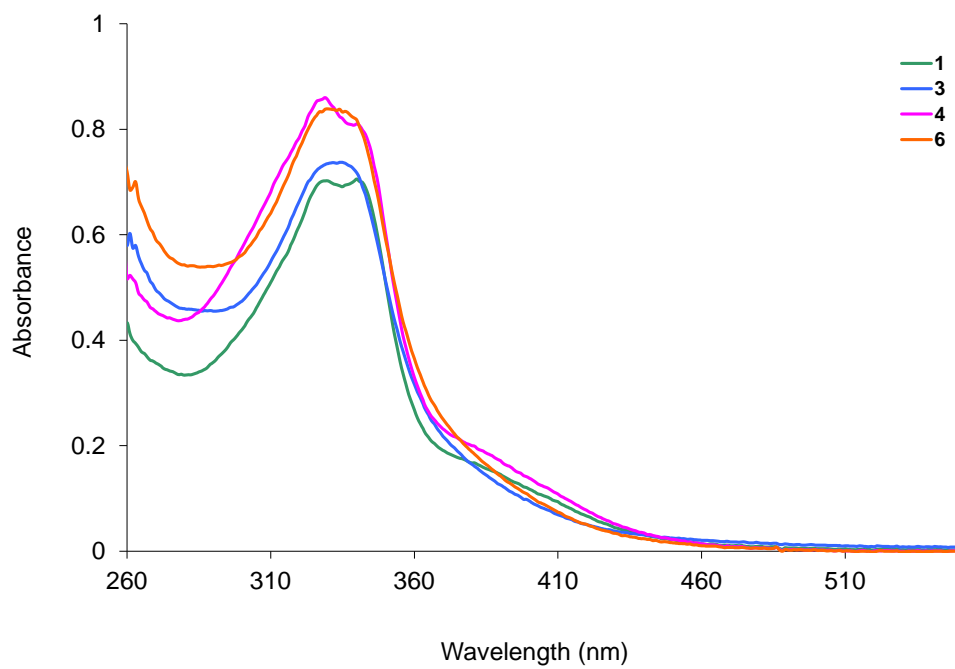

**Fig. S7** Electronic absorption spectra of the complexes in DMSO.

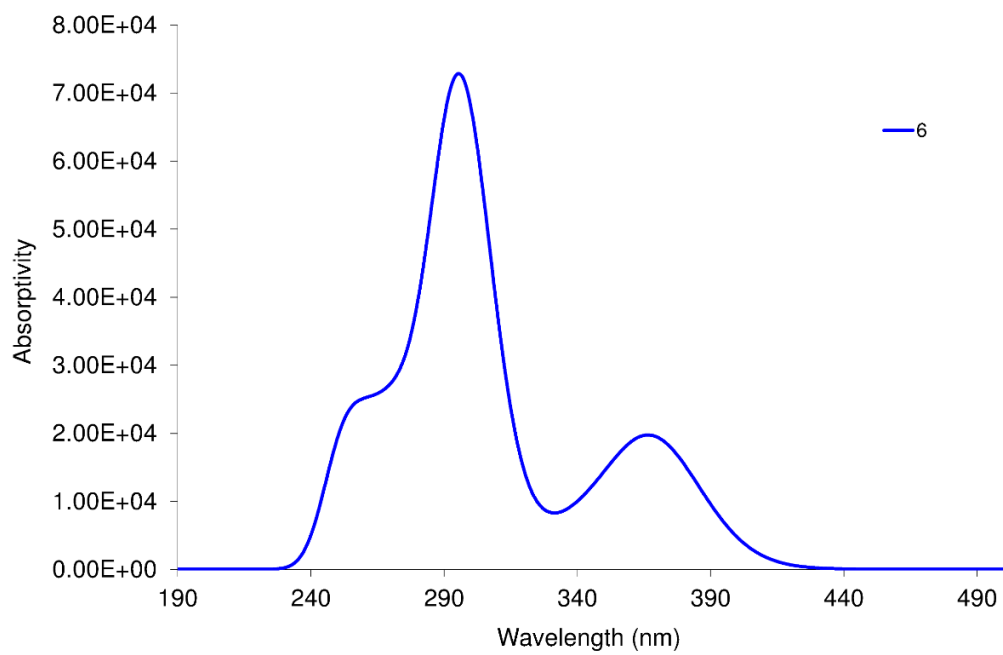

**Fig. S8** Calculated electronic spectra of **6** at TD/PCM(DMSO)/CAM-B3LYP/LANL2DZ level of theory in the singlet state.

**Table S1** Selected frontiers molecular orbitals of **6** in the singlet state calculated at B3LYP/LANL2DZ level of theory.

| Orbital | Frontier molecular orbital                                                           |
|---------|--------------------------------------------------------------------------------------|
| LUMO+2  | 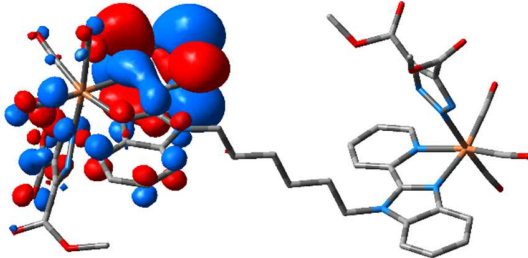   |
| LUMO+1  |   |
| LUMO    |  |
| HOMO    |  |

|        |                                                                                      |
|--------|--------------------------------------------------------------------------------------|
| HOMO-1 | 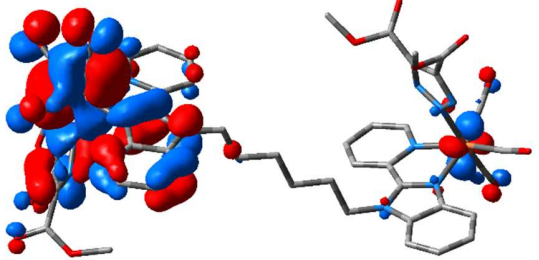   |
| HOMO-2 |    |
| HOMO-3 |   |
| HOMO-5 |  |
| HOMO-6 |  |
